# Supplementary material for: Cryptic diversity in Lithobateswarszewitschii (Amphibia, Anura, Ranidae)
Source: Zookeys. 2019 Apr 11;838:49–69. doi: 10.3897/zookeys.838.29635 (PMC6477815; doi:10.3897/zookeys.838.29635)
Supplement: Supplementary material 1 [file zookeys-838-049-s001.doc]

Supplementary Section

Supplementary Table 1. ABGD analysis from CO1 using all species presented in Table 2.

Supplementary Table 1. The parameters include Gap width (X) = 1, (min) DIST = 0.001 - 0.1 (Max) DIST for P (P = maximum value for intraspecific divergence). Generated through the ABGD user interface website (http://wwwabi.snv.jussieu.fr/public/abgd/).

Supplementary Table 2. Estimates of evolutionary divergence (**π**), and net evolutionary divergence (πnet) over CO1 sequence pairs between groups

Supplementary Table 2. The number of base substitutions per site from averaging over all CO1 sequence pairs between groups are shown above (**π**). The number of base substitutions per site from estimation of net average between groups of CO1 sequences are shown below (NBGMD / πnet). Standard error estimate(s) are shown above the diagonal. Analyses were conducted using the Kimura 2-parameter model (Kimura 1980). The rate variation among sites was modelled with a gamma distribution (shape parameter = 4). The analysis involved 37 nucleotide sequences. There were a total of 658 positions in the final dataset.

Supplementary Table 3. Estimates of evolutionary divergence (**π**), and net evolutionary divergence (πnet) over 16S sequence pairs between groups

Supplementary Table 3. The number of base substitutions per site from averaging over all 16S sequence pairs between groups are shown above (**π**). The number of base substitutions per site from estimation of net average between groups of 16S sequences are shown below (NBGMD / πnet). Standard error estimate(s) are shown above the diagonal. Analyses were conducted using the Kimura 2-parameter model (Kimura 1980). The rate variation among sites was modelled with a gamma distribution (shape parameter = 4). The analysis involved 42 nucleotide sequences. There were a total of 601 positions in the final dataset.

1. CO1 Phylogenetic tree

Supplementary figure 1. CO1 phylogenetic tree. Geographic populations ACG (red), Brewster (orange), El Cope (purple) of *L. warszewitschii* are represented. Samples include GenBank voucher ID, NCBI database information for other ingroup/outgroup species can be found in Table. 4. Posterior probability/branch support is also shown.

1. 16S Phylogenetic tree

Supplementary figure 2. 16S phylogenetic tree. Geographic populations ACG (red), Brewster (orange), El Cope (purple) of *L. warszewitschii* are represented. Samples include GenBank voucher ID, NCBI database information for other ingroup/outgroup species can be found in Table. 4. Posterior probability/branch support is also shown.

Supplementary figure 3. Prior intraspecific genetic divergence and number of OTUs using the ABGD algorithm

Supplementary figure 3. A plot depicting how the number of OTUs recovered by the ABGD algorithm varies with increasing prior intraspecific divergence, using CO1 sequence data from this study (Table 4).
